# Supplementary material for: Agroindustrial Wastes as a Support for the Immobilization of Lipase From <em>Thermomyces lanuginosus</em>: Synthesis of Hexyl Laurate
Source: Preprints.org preprint supplement (doi:10.20944/preprints202103.0124.v1), 2021-03-03
Supplement: Supplementary file 2 [file supplementary]

**Valorization of Agroindustrial wastes from Maranhão (Brazil) as a support for the immobilization of lipase from *Thermomyces lanuginosus* and application in the synthesis of hexyl laurate**

Regiane K. S. Lira,1 Rochele T. Zardini,2 Marcela C. C. de Carvalho,3 Robert Wojcieszak,4 Selma G. F. Leite1 and Ivaldo Itabaiana Jr1,4*

*1 - Federal University of Rio de Janeiro, Department of Biochemical Engineering, School of Chemistry, RJ, 21941-909, Brazil*

*2 - Federal University of Rio de Janeiro, Campus Xerém, RJ, 25245-390, Brazil*

*3 - Federal University of Rio de Janeiro, Chemistry Institute, RJ, 21941-909, Brazil.*

*4 - Univ. Lille, CNRS, Centrale Lille, Univ. Artois, UMR 8181 – UCCS – Unité de Catalyse et Chimie du Solide, F-59000 Lille, France*

**Corresponding author: ivaldo@eq.ufrj.br*

**Supporting Information**

**Figura S1** – Espectro de FTIR do laurato de hexila obtido a partir da reação de esterificação do ácido láurico e n-hexanol catalisado pela TLL imobilizada em suporte MB (mesocarpo de babaçu). 1739 cm-1 (éster) e 1708 cm-1 (ácido orgânico). Condições de análise: Espectrofotômetro Thermo-Nicolet Magna® (IR 760), na faixa espectral de 400 - 4000 cm-1.

1708

1739

Table 1 – Chemical composition of agro-industrial wastes studied.

| **Chemical composition (%)** | | | | | | | | | | |
| --- | --- | --- | --- | --- | --- | --- | --- | --- | --- | --- |
| **Support** | **CNHS (%)** | | | | **Cellulose** | **Hemicellulose** | **Lignin** | **Free Protein** | **Umidity**  **(%)** | **Ash**  **(%)** |
| **C** | **N** | **H** | **S** |
| CG | 57,36 ± 0,4 | 3,87 ± 0,41 | 6,64 ± 0,14 | ˂1 | 7,69 ± 0,6 | 30,78 ± 0,1 | 28,11 ± 0,5 | 0,25 ± 0,1 | 6,68 ± 0,1 | 0,38 ± 0,0 |
| SC | 44,43 ± 0,1 | 1,40 ± 0,51 | 5,61 ± 0,24 | ˂1 | 32,38 ± 0,1 | 12,99 ± 0,0 | 21,34 ± 0,5 | 0,07 ± 0,1 | 4,66 ± 0,1 | 14,79 ± 0,1 |
| BM | 40,23 ± 0,6 | 2,39 ± 0,18 | 5,52 ± 0,64 | ˂1 | 50,25 ± 0,3 | 8,77 ± 0,7 | 7,90 ± 0,3 | 0,12 ± 0,1 | 9,62 ± 0,1 | 0,35 ± 0,3 |
| CC | 43,66 ± 0,7 | 2,84 ± 0,46 | 5,58 ± 0,52 | ˂1 | 33,38 ± 0,3 | 31,72 ± 0,6 | 8,55 ± 0,1 | 0,09 ± 0,1 | 9,56 ± 0,1 | 0,57 ± 0,1 |
| RH | 42,35 ± 0,2 | 2,56 ± 0,05 | 4,91 ± 0,52 | ˂1 | 37,10 ± 0,9 | 12,53 ± 0,6 | 18,08 ± 0,1 | 0,13 ± 0,1 | 9,94 ± 0,1 | 0,52 ± 0,1 |
